# Supplementary material for: Plastid genome evolution across the genus Cuscuta (Convolvulaceae): two clades within subgenus Grammica exhibit extensive gene loss
Source: PubMed Central journal article supplement — J Exp Bot. 2013 Jan 22;64(4):977–89. doi: 10.1093/jxb/ers391 (PMC3580819; doi:10.1093/jxb/ers391), 2013-01-22
Supplement: supp_ers391_Supplemental__Tables2_3.pdf [file supp_ers391_Supplemental__Tables2_3.pdf]

## Supplementary Data

Manuscript: Plastid genome evolution across the genus *Cuscuta* (Convolvulaceae): two clades within subgenus *Grammica* exhibit extensive gene loss

Authors: Thomas Braukmann, Maria Kuzmina, and Saša Stefanović

**Supplementary Table 2** – Oligonucleotides used in this study. Primers were used to amplify hybridization probes for the plastid and mitochondrial genes surveyed.

| Gene                     | Primer name         | Primer sequence (5' to 3') |
|--------------------------|---------------------|----------------------------|
| 16S rDNA                 | 16S-F2              | GACACGGCCCAGACTCCTAC       |
|                          | 16S-R4              | ATCCAGCCGCACCTTCCAG        |
| 23S rDNA                 | 23S 5F              | GGCTTACGGTGGATACCTAG       |
|                          | 23S 4R              | TTCAACATCAGTCGGTTCGG       |
| <i>ndhA</i>              | <i>ndhA</i> .ex1-F2 | GAAGTCTATGGGATCATATG       |
|                          | <i>ndhA</i> .ex1-R2 | GACATAAGAAGTCCAACGGG       |
|                          | <i>ndhA</i> .ex2-F1 | TAAYAGTTYAAGTACAGTTG       |
|                          | <i>ndhA</i> .ex2-F2 | GGTAAAGTCCATCTTGTTCG       |
| <i>ndhB</i> <sup>1</sup> | 7F                  | GGAAGTTTSATTTTCCCAGAATG    |
|                          | 10R                 | CCTTCGTAGACGTCAGGAGTCCATTG |
|                          | 12F                 | CTTTCTGTTACTTCGAAAGTAGC    |
|                          | 14R                 | GGTATAGTAGATGCTATCACACA    |
| <i>ndhC</i>              | <i>ndhC</i> -F1     | GTTTCTGCTTTACGAATATG       |
|                          | <i>ndhC</i> -R1     | ATAAGCACGAAAATGAAAGC       |
| <i>ndhD</i>              | <i>ndhD</i> .5'-F1b | CTCCTTCTAACGACTTATGC       |
|                          | <i>ndhD</i> .5'-R2  | AATATAGAATGGGCATGAGG       |
|                          | <i>ndhD</i> .3'-F2  | GCAGCTTTAACATCTCTTGG       |
|                          | <i>ndhD</i> .3'-R1b | ATGAAAGAACGAAATCCGGG       |
| <i>ndhE</i>              | <i>ndhE</i> -F1     | ATGTACTIONTTTTGAGTGCC      |
|                          | <i>ndhE</i> -R1tob  | TTATTCAACAAATTTGATTG       |
| <i>ndhF</i> <sup>2</sup> | 536F                | TTGTAATAATCGTAGGGGA        |
|                          | 1318R               | CGAAACATATAAAATGCRGTTAATCC |
| <i>ndhG</i>              | <i>ndhG</i> -F1     | CCAATACATGATTTTCTTTT       |
|                          | <i>ndhG</i> -R3     | CGAGCTACAGCAATTGCACC       |
| <i>ndhH</i>              | <i>ndhH</i> .5'-F1  | CTCATGATAGTCAATATGGG       |
|                          | <i>ndhH</i> .5'-R2  | TCTGCGACCAATATCCGCC        |
|                          | <i>ndhH</i> .3'-F3  | GAAGGAGATTCATTAGCTCG       |
|                          | <i>ndhH</i> .3'-R3b | TTGATAAAAACCTGGTGGGCG      |
| <i>ndhI</i>              | <i>ndhI</i> -F2     | ATGCTCCCTATGATAACTG        |
|                          | <i>ndhI</i> -R1     | TGTGTAATCATCAATTACTG       |
| <i>ndhJ</i>              | <i>ndhJ</i> -F1     | TCGTTTGTCTGTTTGGCTAG       |
|                          | <i>ndhJ</i> -R1     | CAATGAGCATCTTGTATTTT       |
| <i>ndhK</i>              | <i>ndhK</i> -F2b    | ACTCTCTAGTTTATGGCCCG       |

|              |                     |                               |
|--------------|---------------------|-------------------------------|
|              | ndhK-R1tob          | TCTCGAGATATTTTCTTACG          |
| <i>psaA</i>  | psaA 5'F            | TCGAGGAATGGGCCAGAC            |
|              | psaA 5'R            | GGCCCCTGACCTAGTAAATGG         |
| <i>psaB</i>  | psaB angio F1       | CATTAMGATTTCCAAGGTTTAGC       |
|              | psaB angio R1       | ATACTGTGCCCAATCCCG            |
|              | psaB angio F3       | RGGKCGTGGRCAATAAGG            |
|              | psaB angio R3       | CCTACMGAAAAGTGRGCTAATCCA      |
| <i>psaC</i>  | psaC angio F        | TGTGTHCGAGCHTGYCCYACDGAT      |
|              | psaC angio R        | CCCATRCTKCGRGTGTMTCT          |
| <i>psbA</i>  | psbA angio F        | TGGGGTCGCTTCTGTAA             |
|              | psbA angioR         | AGGTCTAGAGGGAAGTTRTGA         |
| <i>psbB</i>  | psbB f              | AGCGGTTTTTGATCCTTCTG          |
|              | psbB r              | CTGACGCCGTTGAGTTCAC           |
| <i>psbC</i>  | psbC 46F            | GGTTYGCTTGGTGGGCGYGGGAATCG    |
|              | psbC 49R            | GTATTATTGAACCAGACAAAACAACAAGC |
| <i>psbD</i>  | psbD 40F            | ATGACTGGTTACGRAGGGACCG        |
|              | psbD 45R            | CCTCCTCAGGGAATATAAGRTTTTCAT   |
| <i>psbE</i>  | psbE angio F        | GGAAGCACAGGAGAACG             |
|              | psbE angio R        | AATBCCTTGTCGGCTCTCT           |
| <i>rbcl</i>  | rbcl 3F             | GGAGAAAAAGATCAATATATTGC       |
|              | rbcl 14R            | GGTAAAGAAACCCAATCTTGAG        |
| <i>petA</i>  | petA f              | CGGACATCCATTTCAAGTGC          |
|              | petA 1R             | TTGGTCAATTGGACCTTCTC          |
| <i>petB</i>  | petB exon 2 F       | GAAGAACGTCTCGAGATTCAAGC       |
|              | petB exon 2 R       | GGCCCAGAAATACCTTGTTTACG       |
| <i>petD</i>  | petD exon 2 F       | GGAGAGCCCCGCATGG              |
|              | petD 3' exon R      | GTAATGTTGCACCAATGCCC          |
| <i>atpA</i>  | atpA angio F1       | ATCCGTGAACGTATTGARCA          |
|              | atpA angio R1       | CCAKYTYTCTGAATAGCTT           |
| <i>atpB</i>  | atpB H <sup>3</sup> | TGTCCTGAAGTTCTTTGTAACGTTG     |
|              | atpB P <sup>3</sup> | CCCCTTGATAATTTAGGTCC          |
| <i>atpF</i>  | atpF angio F        | GTTTHYTTGGGYCACTG             |
|              | atpF angio R        | RCTAKAGCTCCTYGTAAHGCTT        |
| <i>atpH</i>  | atpH angio F        | ATGAATCCAYTGRTTKCTGC          |
|              | atpH angio R        | GCTACRACCARRCCRTAAA           |
| <i>atpI</i>  | atpI angio F        | TCCARRTYCATGSCCARG            |
|              | atpI angio R        | ACAGGTATAGGAACYACYRARGGTAC    |
| <i>rpoA</i>  | rpoA F1             | SAGTGGAAARTGTGKGAATCA         |
|              | rpoA R3             | TCYTBVSTSTTABTCAAAAGKTCC      |
| <i>rpoB</i>  | rpoB F2             | TAGTYCTATYATCAGCTATGGG        |
|              | rpoB R4             | TCCAAYCCMGTCCAACAATGC         |
| <i>rpoC1</i> | rpoC1 F2            | GATACACTTCTTGATAATGG          |

|                         |                                                             |                                                                                                       |
|-------------------------|-------------------------------------------------------------|-------------------------------------------------------------------------------------------------------|
| <i>rpoC2</i>            | rpoC1 3`R5<br>rpoC2 F3<br>rpoC2 R5                          | GACCAACAGTGGTTCGAATG<br>CATTAAGAACTTTTCATACYGG<br>ATCCGYTGGACATAGATCCA                                |
| <i>rps2</i>             | rps2 1<br>rps2 3c                                           | GCGAATACTAATTTGTTAAG<br>GGAACATAAATTTGGAAGAG                                                          |
| <i>rps4</i>             | rps4 angio F                                                | GCTTTACCNGGACTAACTA                                                                                   |
|                         | rps4 angio R                                                | CTATCTATKATTTGATTDACTAATCC                                                                            |
| <i>rps7</i>             | rps7 angio F                                                | GAAACAAATCCACTATCYGTTTTAC                                                                             |
|                         | rps7 angio R                                                | GCAAAAAGCTCTATTTGCCCTCT                                                                               |
| <i>rps16</i>            | rps16 3`F1b<br>rps16 3`R1b                                  | GAGCCGTCTATCGAATCG<br>TTAGGATTGATTAGGACG                                                              |
| <i>rpl2<sup>1</sup></i> | 20F<br>25R                                                  | AAAGGTCGTAATGCCAGAGGAGGAAT<br>TTCCAAGYGCAGGATAACCCCA                                                  |
| <i>rpl14</i>            | rpl14 angio F                                               | GGGCTCGAGAATTGATGTG                                                                                   |
|                         | rpl14 angio R                                               | CCTCRGGAGCTARKGAACTAT                                                                                 |
| <i>rpl20</i>            | rpl20 angio F                                               | CGGAGRCGTMGAACAAAAAT                                                                                  |
|                         | rpl20 angio R                                               | TTGTGCAAGTATTTTACGRTTAAGAAG                                                                           |
| <i>rpl23</i>            | rpl23 angio F                                               | GGATGGAATCAAATATGCAG                                                                                  |
|                         | rpl23 angio R                                               | YTMTAAGAGGTGGAATAGAATAACC                                                                             |
| <i>rpl32</i>            | rpl32 F<br>rpl32 R                                          | GGCAGTTCCAAAAAACG<br>ACTTATTTATTTTGTGGCGTA                                                            |
| <i>accD</i>             | accD 5`F1<br>accD 5`R3<br>cus F<br>cus R                    | GGGGGCAAGAAAACCTATG<br>CAAATGATATCCACATTGTTTAC<br>CRTTAGGGATAKSAMCGGAG<br>AAGYACSGGGTTCGGTAA          |
| <i>ccsA</i>             | ccsA ang F<br>ccsA ang R                                    | GGATTATTARTTACTCGTTGG<br>TCCAAGTAATAAAWGCCCAAG                                                        |
| <i>cemA</i>             | cemA ang F<br>cemA ang R                                    | GGRTTACTAATTGGTGAATAC<br>TTGAATGATAAATCACTACAAG                                                       |
| <i>clpP</i>             | clpP intr1/2F<br>clpP 2Rb                                   | CCTAATCAACCGACTTTATC<br>AGCGTGAGGGAATGCTAGAC                                                          |
| <i>matK</i>             | trnK 685F<br>matK 1932R<br>matK MonoEx 4F<br>matK MonoEx R3 | GTATCGCACTATGTATCATTTGA<br>CAGAACGGATTACTAATGGG<br>ATCTCAGAATTTACGATCAATTC<br>CCCAAGCTTTGTAAAAAAGCGCG |
| <i>ycf1 5`</i>          | ycf1 5` F1<br>ycf1 5` R2                                    | AAATTCGGTCGTTGTGGTCGGAC<br>AAGATATTCKTTSTTTTCCATCA                                                    |
| <i>ycf2 3`</i>          | ycf2 ang 3`F<br>ycf2 ang 3`R                                | TTGTAGCACTTACCAATGAGG<br>TCATTTTATCCGGGAAAAGCC                                                        |
| <i>paf2 (ycf4)</i>      | ycf4 angio F                                                | GGCGATCAGAACATATATGG                                                                                  |

|              |              |                       |
|--------------|--------------|-----------------------|
| <i>ycf15</i> | ycf4 angio R | ATACTTCAATTGGTACACGC  |
|              | solanac F    | ATGTTACTGCTGAAACACGG  |
|              | solanac R    | CGCCTGTTGGCATTCCAGCC  |
| <i>atp1</i>  | 5            | GAGCTGCGGAACTMACVAVTC |
|              | 4            | CATTGATCACAGAAKCCRTT  |

---

<sup>1</sup>Primer names and sequences after Graham and Olmstead (2000).

<sup>2</sup>Primer names and sequences after Olmstead and Sweere (1994).

<sup>3</sup>Primer names and sequences after Hoot et al. 1995.

**Supplemental Table 3** – List of probes used in the hybridizations. The length (bp), GC content, and the structural location within the plastome of *Nicotiana tabacum* (tobacco) are provided for each probe. The typical plastome of a green plant is divided into three partitions; the inverted repeat (IR), small single copy region (SSC), and large single copy region (LSC)

| Gene            | length | GC    | Location | Gene           | length | GC    | Location |
|-----------------|--------|-------|----------|----------------|--------|-------|----------|
| <i>16S</i>      | 1185   | 0.567 | IR       | <i>atpA</i>    | 1459   | 0.411 | LSC      |
| <i>23S</i>      | 747    | 0.534 | IR       | <i>atpB</i>    | 862    | 0.425 | LSC      |
| <i>ndhA ex1</i> | 380    | 0.379 | SSC      | <i>atpF</i>    | 1132   | 0.348 | LSC      |
| <i>ndhA ex2</i> | 429    | 0.347 | SSC      | <i>atpH</i>    | 212    | 0.495 | LSC      |
| <i>ndhB ex1</i> | 692    | 0.379 | IR       | <i>atpI</i>    | 550    | 0.369 | LSC      |
| <i>ndhB ex2</i> | 680    | 0.366 | IR       | <i>rpoA</i>    | 872    | 0.35  | LSC      |
| <i>ndhC</i>     | 306    | 0.359 | LSC      | <i>rpoB</i>    | 1162   | 0.387 | LSC      |
| <i>ndhD 5'</i>  | 698    | 0.355 | SSC      | <i>rpoC1</i>   | 979    | 0.392 | LSC      |
| <i>ndhD 3'</i>  | 583    | 0.365 | SSC      | <i>rpoC2</i>   | 1292   | 0.386 | LSC      |
| <i>ndhE</i>     | 289    | 0.322 | SSC      | <i>rps2</i>    | 655    | 0.395 | LSC      |
| <i>ndhF</i>     | 808    | 0.361 | SSC      | <i>rps4</i>    | 494    | 0.379 | LSC      |
| <i>ndhG</i>     | 509    | 0.334 | SSC      | <i>rps7</i>    | 293    | 0.44  | IR       |
| <i>ndhH 5'</i>  | 358    | 0.411 | SSC      | <i>rps16</i>   | 218    | 0.376 | LSC      |
| <i>ndhH 3'</i>  | 323    | 0.375 | SSC      | <i>rpl2</i>    | 1315   | 0.423 | IR       |
| <i>ndhI</i>     | 462    | 0.368 | SSC      | <i>rpl14</i>   | 318    | 0.406 | LSC      |
| <i>ndhJ</i>     | 467    | 0.411 | LSC      | <i>rpl20</i>   | 267    | 0.401 | LSC      |
| <i>ndhK</i>     | 390    | 0.415 | LSC      | <i>rpl23</i>   | 266    | 0.38  | IR       |
| <i>psaA</i>     | 936    | 0.439 | LSC      | <i>rpl32</i>   | 164    | 0.335 | SSC      |
| <i>psaB 5'</i>  | 898    | 0.431 | LSC      | <i>accD</i>    | 785    | 0.341 | LSC      |
| <i>psaB 3'</i>  | 898    | 0.431 | LSC      | <i>ccsA</i>    | 613    | 0.336 | SSC      |
| <i>psaC</i>     | 185    | 0.465 | SSC      | <i>cemA</i>    | 579    | 0.33  | LSC      |
| <i>psbA</i>     | 969    | 0.425 | LSC      | <i>clpP</i>    | 298    | 0.416 | LSC      |
| <i>psbB</i>     | 1104   | 0.444 | LSC      | <i>matK</i>    | 1256   | 0.326 | LSC      |
| <i>psbC</i>     | 791    | 0.43  | LSC      | <i>ycf1 5'</i> | 1229   | 0.36  | IR       |
| <i>psbD</i>     | 978    | 0.438 | LSC      | <i>ycf2 3'</i> | 1284   | 0.411 | IR       |
| <i>psbE</i>     | 183    | 0.437 | LSC      | <i>paf2</i>    | 543    | 0.39  | LSC      |
| <i>rbcL</i>     | 842    | 0.416 | LSC      | <i>ycf15</i>   | 187    | 0.417 | IR       |
| <i>petA</i>     | 866    | 0.426 | LSC      |                |        |       |          |
| <i>petB</i>     | 617    | 0.42  | LSC      |                |        |       |          |
| <i>petD</i>     | 367    | 0.401 | LSC      |                |        |       |          |
